## RETRACTION

# Retraction: Inhibition of HMGB1-Induced Angiogenesis by Cilostazol via SIRT1 Activation in Synovial Fibroblasts from Rheumatoid Arthritis

Hye Young Kim, So Youn Park, Sung Won Lee, Hye Rin Lee, Won Suk Lee, Byung Yong Rhim, Ki Whan Hong, Chi Dae Kim

Following publication of this article [1], concerns were raised about western blot images in Figs 3D, 4B, and 4E. Specifically,

- In Fig 3D, there is an appearance of vertical discontinuities on either side of lane 4 in the VEGF panel; the  $\beta$ -Actin panel is a duplicate of lanes 1–5 of the  $\beta$ -Actin panel in Fig 4B.
- In Fig 4B and 4E, the  $\beta$ -Actin panels were included as a result of an error in figure assembly.  $\beta$ -Actin is a cytosolic protein, and was not measured in these experiments because NF- $\kappa$ B translocation was measured in nuclear extracts, and results were expressed relative to control untreated cells.

The authors retract this article as it is not possible to fully resolve the concerns regarding Fig 3D because the majority of the underlying data for the article is unavailable.

HYK, SYP, SWL, HRL, WSL, BYR, CDK agreed with the retraction. KWH either could not be reached or did not reply directly.

## Reference

1. Kim HY, Park SY, Lee SW, Lee HR, Lee WS, Rhim BY, et al. (2014) Inhibition of HMGB1-Induced Angiogenesis by Cilostazol via SIRT1 Activation in Synovial Fibroblasts from Rheumatoid Arthritis. PLoS ONE 9(8): e104743. <https://doi.org/10.1371/journal.pone.0104743> PMID: 25126750

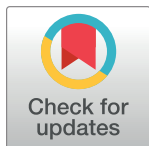

## OPEN ACCESS

**Citation:** Kim HY, Park SY, Lee SW, Lee HR, Lee WS, Rhim BY, et al. (2020) Retraction: Inhibition of HMGB1-Induced Angiogenesis by Cilostazol via SIRT1 Activation in Synovial Fibroblasts from Rheumatoid Arthritis. PLoS ONE 15(3): e0230889. <https://doi.org/10.1371/journal.pone.0230889>

**Published:** March 19, 2020

**Copyright:** © 2020 Kim et al. This is an open access article distributed under the terms of the [Creative Commons Attribution License](https://creativecommons.org/licenses/by/4.0/), which permits unrestricted use, distribution, and reproduction in any medium, provided the original author and source are credited.
